# Supplementary material
Source: PubMed Central journal article supplement (PMC2516887)
Supplement: emboj2008139s1.pdf [file emboj2008139s1.pdf]

## **Reconstituted membrane fusion requires regulatory lipids, SNAREs, and synergistic SNARE-chaperones**

Joji Mima, Christopher M Hickey, Hao Xu, Youngsoo Jun,# and William Wickner\*

Department of Biochemistry, Dartmouth Medical School, Hanover, NH03755, USA

### **Supplementary Materials and methods**

#### ***Protein expression and purification***

*S. cerevisiae* VAM3, VTI1, and NYV1 genes were subcloned into pGST-parallel1 vectors (Sheffield *et al.*, 1999), encoding GST and a TEV protease sites. For Vam3p production, the linker region between TEV and VAM3 was deleted, to obtain full-length, untagged Vam3p with an extra N-terminal glycyl residue after cleavage by TEV protease. For Vti1p and Nyv1p, the GST and linker sequences upstream of VTI1 and NYV1 were deleted, yielding full-length untagged Vti1p and Nyv1p without extra residues.

SNAREs were produced in *E. coli* Rosetta2 (Novagen) in TB medium with ampicillin and chloramphenicol by induction with 1 mM IPTG (3h, 37°C, 4 L). Cells were suspended in 40 ml HB (20 mM Hepes-NaOH, pH 8.0, 1 mM EDTA, 1 mM DTT) with 100 mM NaCl, lysed by French press, and centrifuged (60Ti [Beckman], 50,000 rpm, 30 min, 4°C).

For GST-Vam3p, lysate pellets were resuspended in PBS with 1 mM EDTA, 1 mM DTT, 10% glycerol, and 100 mM  $\beta$ -OG and incubated (4°C, 1 h) with gentle agitation. The lysate was centrifuged (60 Ti rotor, 50,000 rpm, 30 min, 4°C) and the supernatant was applied to a 1.5 x 5 cm glutathione-Sepharose column in resuspension buffer. The column was washed with 100 ml of the resuspension buffer. GST-Vam3p was eluted with

100 mM Hepes-NaOH, pH 8.0, 100 mM NaCl, 1 mM EDTA, 1 mM DTT, 100 mM  $\beta$ -OG, 10% glycerol, 20 mM reduced glutathione.

For Vti1p and Nyv1p, lysate pellets were re-suspended in 40 ml HB, 100 mM NaCl, 0.5% Thesit and incubated (4°C, 1 h, gentle agitation). After centrifugation (60 Ti rotor, 50,000 rpm, 30 min, 4°C), supernatants were loaded onto Q-Sepharose columns. After washing the columns with 100 ml of HB, 10% glycerol, 40 mM CHAPS, Vti1p and Nyv1p were eluted with HB, 500 mM NaCl, 10% glycerol, 40 mM CHAPS.

Full-length, untagged Vam7p was purified from *E. coli*, producing chitin-binding domain (CBD) -Vam7p fusion protein which was isolated, cleaved, and eluted as described (Starai *et al*, 2007). TEV protease (Jun *et al*, 2007),  $\alpha$ Vam3p (Collins *et al*, 2005), His<sub>6</sub>-Sec17p (Haas and Wickner, 1996), His<sub>6</sub>-Sec18p (Haas and Wickner, 1996), and HOPS complex bearing Vps33p-GST fusion protein (Starai *et al*, 2008) were purified as described. HOPS purified without a GST tag had the same activity in our lipid mixing assays.

For purification of Vps33p, *S. cerevisiae* strain CHY2 was constructed by transforming yeast FY834 (MAT $\alpha$ , ura3-52, leu2 $\Delta$ 1, lys2 $\Delta$ 202, trp1 $\Delta$ 63, his3 $\Delta$ 200, GAL2+) (Winston *et al*, 1995) with linearized p403GAL1-VPS33-TEV-GST (Starai *et al*, 2008). CHY2 from solid CSM-his dropout medium (MP Biomedicals) was grown at 30°C in 8 L of YPD to O.D.<sub>600</sub> ~ 2.0. Cells were harvested (Beckman JA10 rotor, 5000 rpm, 5 min, 23°C), resuspended in 500 ml Milli-Q water, centrifuged as above, resuspended in 30 ml of 20 mM Hepes-NaOH, pH 7.8, 200 mM NaCl, 2.5% glycerol, 5 mM 2-mercaptoethanol, PMSF (1 mM), leupeptin (0.46  $\mu$ g/ml), pepstatin A (3.5  $\mu$ g/ml), and pefabloc-SC (2.4  $\mu$ g/ml) and frozen in liquid nitrogen. Frozen yeast cells were lysed in a Waring blender

(Goode *et al*, 1999), the powder was thawed, and the extract centrifuged (13,000 rpm, 20min, 4°C, JA-20). Supernatants were collected, mixed with Triton X-100 (0.05 %), and incubated on ice for 20 minutes. Insoluble material was removed (60Ti, 30 min, 50,000 rpm, 4°C) and the supernatant was passed through a 0.45 micron syringe driven filter (Millipore). The extract was applied to a 25x80 mm Glutathione Sepharose 4B (GE Healthcare) column in 20 mM Hepes-NaOH, pH 7.8, 200 mM NaCl, 5% glycerol, 5 mM 2-mercaptoethanol, 0.05 % Triton X-100 at 4°C. The column was washed with 3 volumes of this buffer, then 3 volumes of 20 mM Hepes-NaOH, pH 7.8, 50 mM NaCl, 5% glycerol, 5 mM 2-mercaptoethanol, 0.05 % Triton X-100. Protein was eluted with this buffer containing 20 mM glutathione. Fractions containing Vps33 were pooled, mixed with TEV protease, and incubated at 4°C overnight. The protein was then applied to a MonoQ 5/50 GL column (GE Healthcare), and eluted with a 20 ml linear gradient of 0.05 to 1.0M NaCl in 20 mM Hepes-NaOH, pH 7.8, 200 mM sorbitol, 10% glycerol, 5 mM 2-mercaptoethanol, 0.002 % Triton X-100.

### **Supplementary References**

Goode BL, Wong JJ, Butty AC, Peter M, McCormack AL, Yates JR, Drubin DG, Barnes G (1999) Coronin promotes the rapid assembly and cross-linking of actin filaments and may link the actin and microtubule cytoskeletons in yeast. *J Cell Biol* **144**: 83-98

Sheffield P, Garrard S, Derewenda Z (1999) Overcoming expression and purification problems of RhoGDI using a family of “Parallel” expression vectors. *Protein Express*

*Purif* **15**: 34-39

Winston F, Dollard C, Ricupero-Hovasse SL (1995) Construction of a set of convenient *Saccharomyces cerevisiae* strains that are isogenic to S288C. *Yeast* **11**: 53-55

### Supplementary Figure legends

**Figure S1** Coomassie-stained gels of purified yeast vacuolar SNAREs, SNARE chaperones, and proteoliposomes bearing the SNAREs. **(A)** Purified SNAREs (GST-Vam3p, Vti1p, Vam7p, and Nyv1p) and SNARE chaperones (His<sub>6</sub>-Sec17p, His<sub>6</sub>-Sec18p, GST-HOPS, and Vps33p). **(B-D)** SNARE proteoliposomes with DO-lipids and lipid compositions of PC/PS **(B)**, vacuolar lipids **(C)**, and vacuolar lipids with DAG/PI(3)P/PI(4,5)P<sub>2</sub> **(D)**. **(E-I)** SNARE proteoliposomes with PO-lipids and the complete lipid composition (vacuolar lipids with DAG/PI(3)P/PI(4,5)P<sub>2</sub>) **(E-I)** or without DAG, PI(3)P/PI(4,5)P<sub>2</sub>, ERG, PI(3)P, or PI(4,5)P<sub>2</sub> **(H and I)**. Donor and acceptor liposomes are “D” and “A”, respectively. See Table SI and Materials and methods for the lipid and SNARE compositions of these liposomes.

**Figure S2** Lipid mixing of vacuolar SNARE liposomes. Mean values and standard deviations from more than 3 independent experiments. **(A)** PC/PS liposome pairs bearing the 3Q-SNAREs and the R-SNARE. **(B)** PC/PS liposomes bearing all 4 SNAREs. **(C)** Vacuolar lipid (DO-lipid) liposome pairs bearing the 3Q-SNAREs and the R-SNARE. **(D)** Vacuolar lipid (DO-lipid) liposomes bearing all 4 SNAREs. **(E)** Vacuolar (DO-lipid)

and regulatory lipids liposomes bearing all 4 SNAREs.

**Figure S3** Lipid mixing of vacuolar SNARE liposomes with Sec17p/Sec18p and HOPS.

(A) HOPS-dependent enhancement of lipid mixing of vacuolar lipid (DO-lipid) liposome pairs bearing the 3Q-SNAREs and the R-SNARE, in the presence of Sec17p and Sec18p.

(B) Lipid mixing of vacuolar lipid (DO-lipid) liposomes bearing all 4 SNAREs requires Sec17p/Sec18p. (C) Lipid mixing of vacuolar lipid (DO-lipid) liposomes bearing all 4

SNAREs requires HOPS. Lipid mixing assays were performed as described in Materials and methods.

Figure S1. Mima et al.

**A Purified SNAREs and SNARE chaperones**

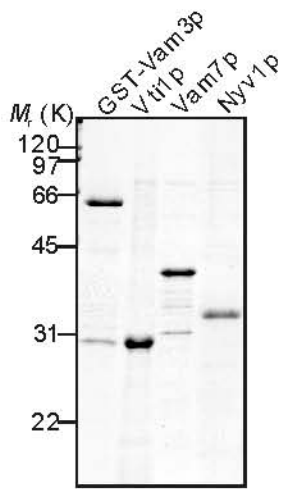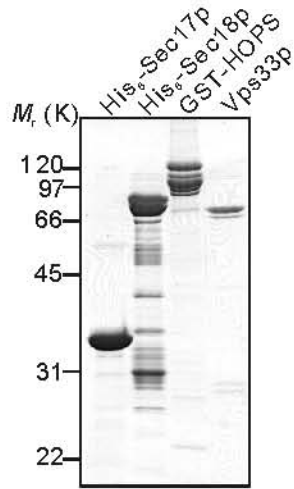

**B PC/PS (DO-lipids)**

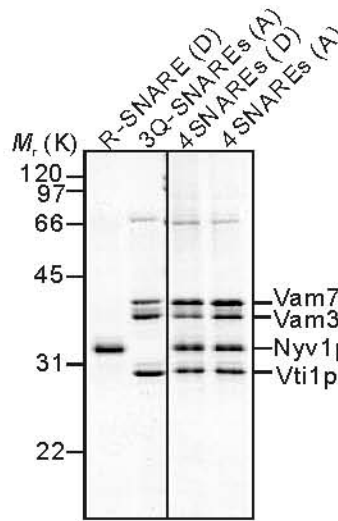

**C Vacuolar lipids (DO-lipids)**

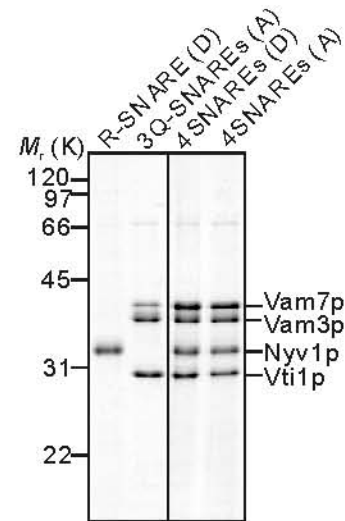

**D w/ DAG/PIPs (DO-lipids)**

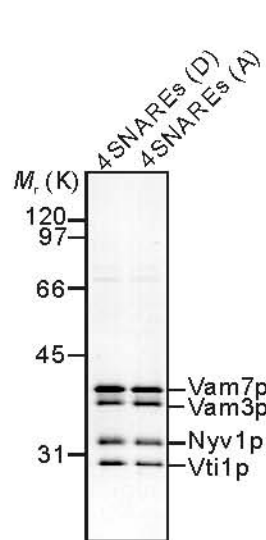

**E w/ DAG/PIPs (PO-lipids)**

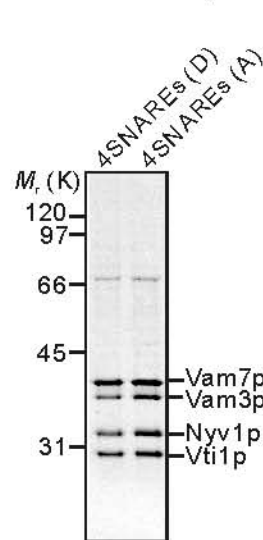

**F w/ DAG/PIPs (PO-lipids)**

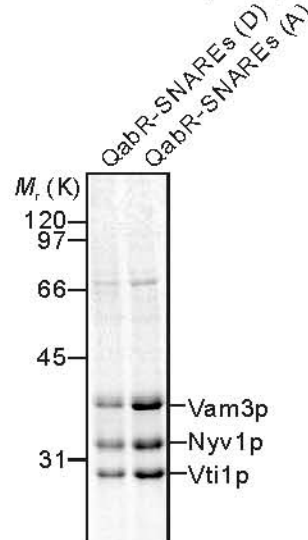

**G w/ DAG/PIPs (PO-lipids)**

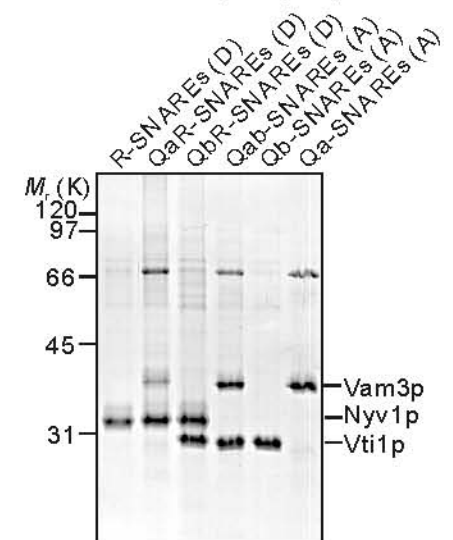

**H w/o DAG, PIPs, or ERG (PO-lipids), 4SNAREs**

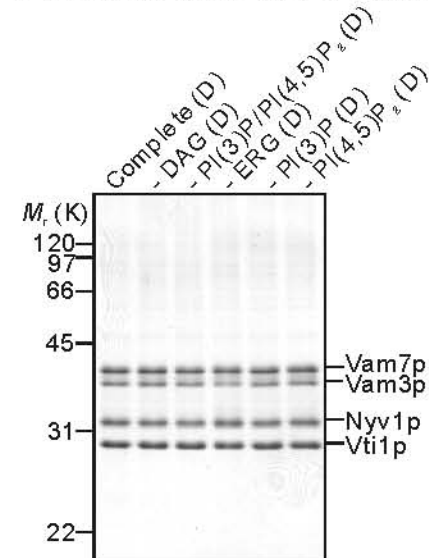

**I w/o DAG, PIPs, or ERG (PO-lipids), 4SNAREs**

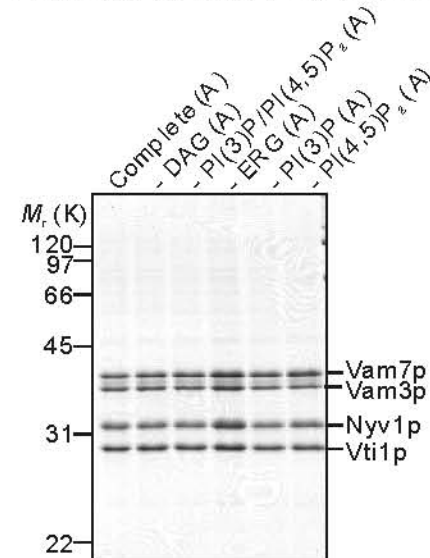

Figure S2. Mima et al.

**A PC/PS (DO-lipids), R- and 3Q-SNAREs**

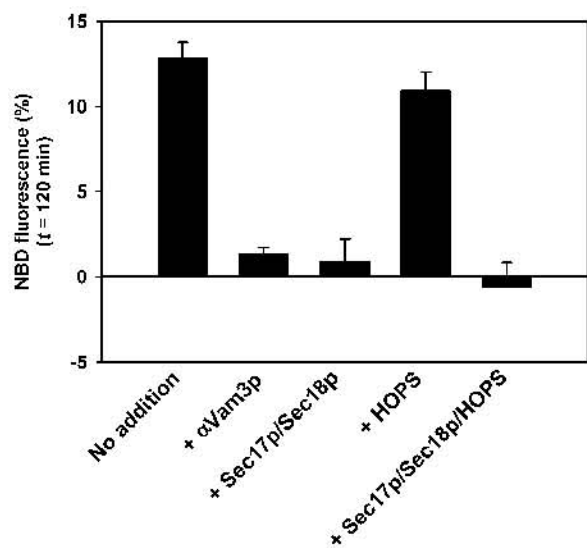

**B PC/PS (DO-lipids), 4 SNAREs**

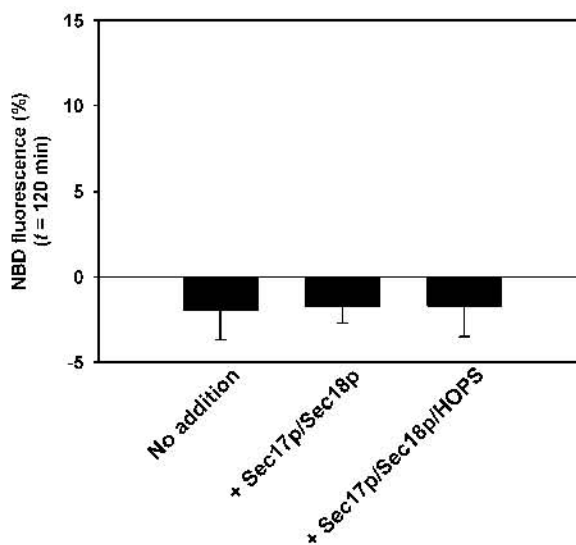

**C Vacuolar lipids (DO-lipids), R- and 3Q-SNAREs**

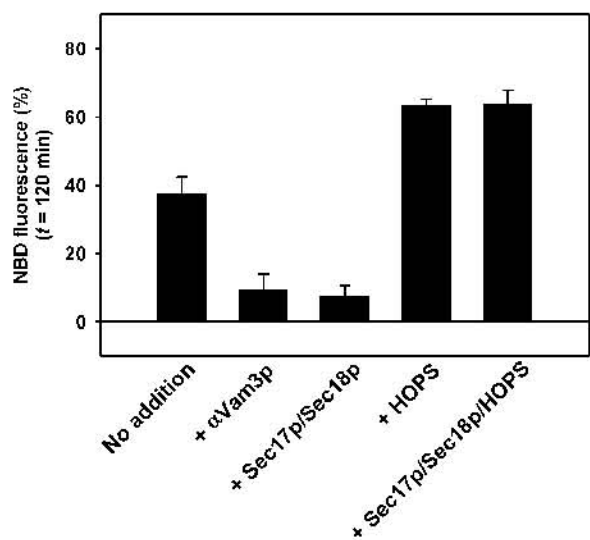

**D Vacuolar lipids (DO-lipids), 4 SNAREs**

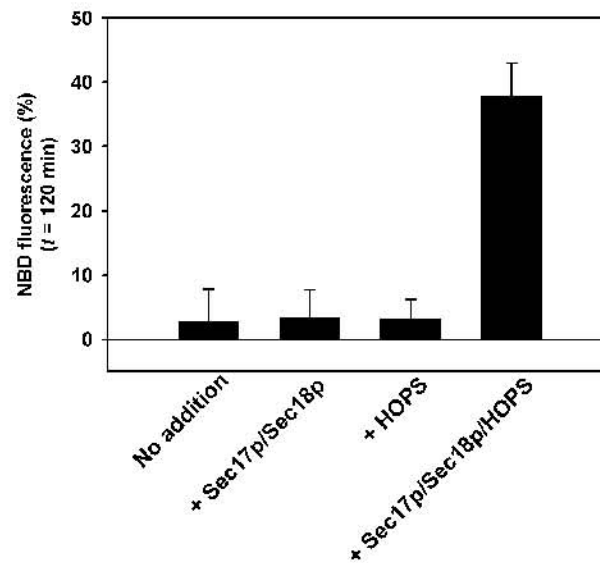

**E w/ DAG/PIPs (DO-lipids), 4 SNAREs**

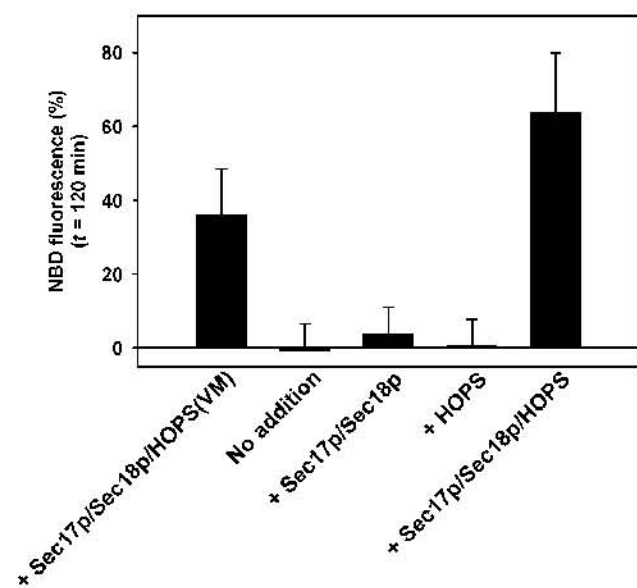

Figure S3. Mima et al.

A

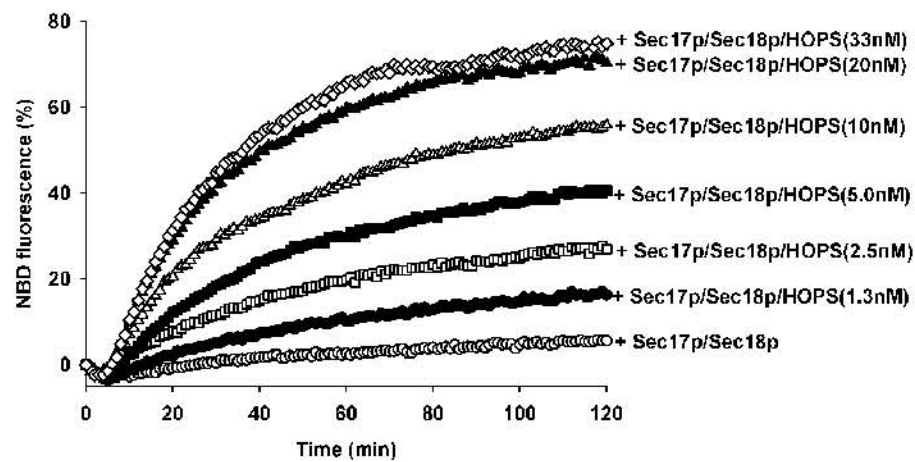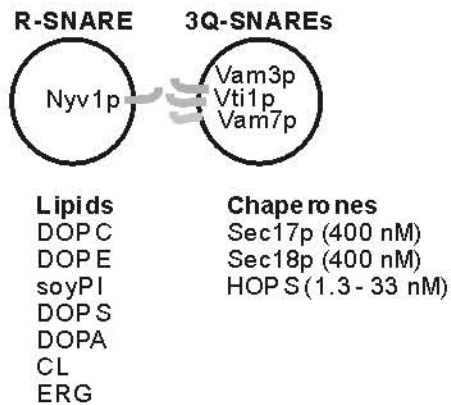

B

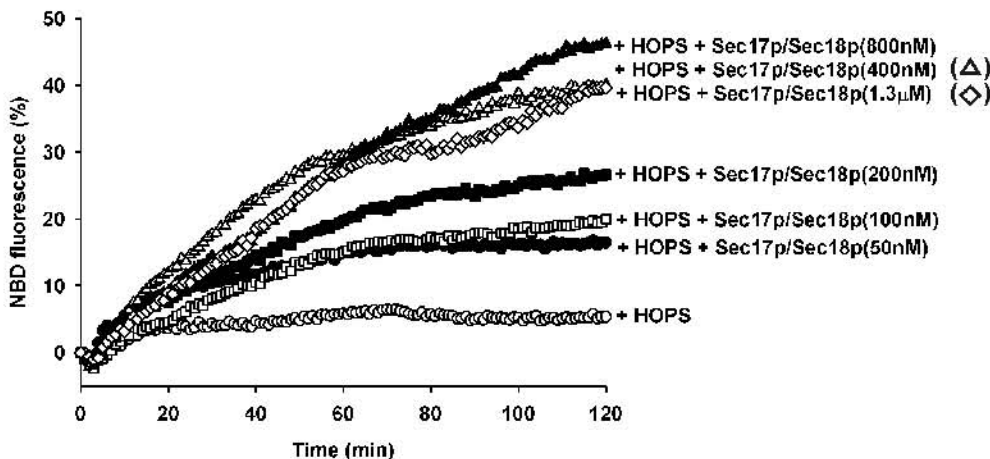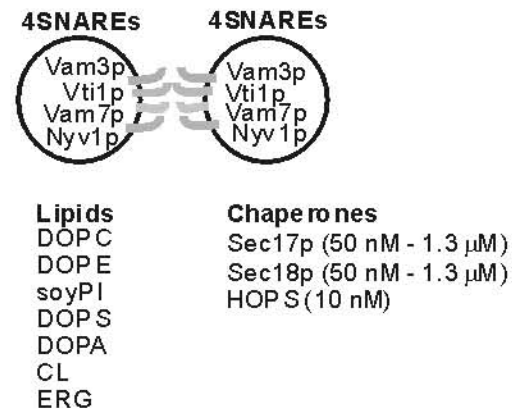

C

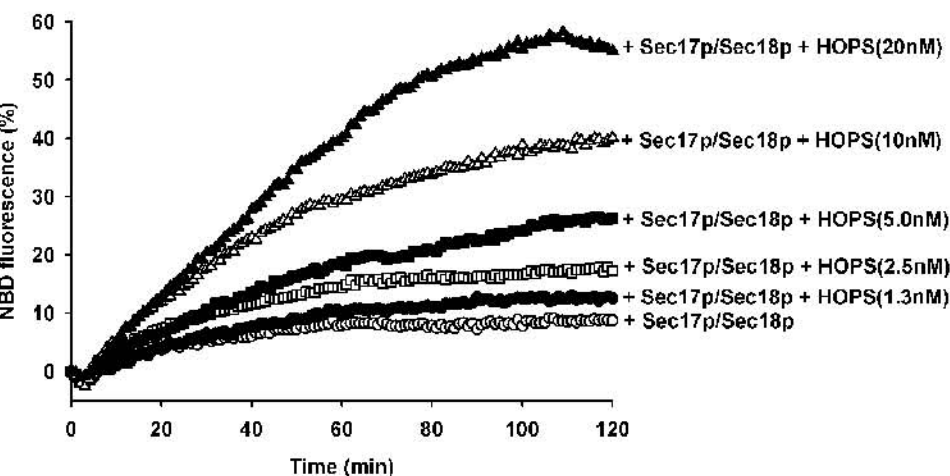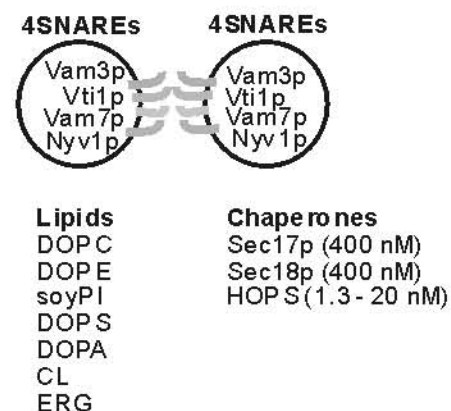



**Table SI** SNARE densities of reconstituted proteoliposomes bearing yeast vacuolar SNAREs used in this study

| RPLs                | Lipids <sup>1</sup>      | SNAREs | Lipid/SNARE <sup>2</sup><br>(mole/mole) | Figures |
|---------------------|--------------------------|--------|-----------------------------------------|---------|
| R-SNARE, donor      | PC/PS (DO)               | Nyv1p  | 530                                     | 1A      |
| 3Q-SNAREs, acceptor | PC/PS (DO)               | Vam3p  | 1000                                    | 1A      |
|                     |                          | Vti1p  | 710                                     |         |
|                     |                          | Vam7p  | 1500                                    |         |
| 4SNAREs, donor      | PC/PS (DO)               | Vam3p  | 1300                                    | 1B      |
|                     |                          | Vti1p  | 770                                     |         |
|                     |                          | Vam7p  | 910                                     |         |
|                     |                          | Nyv1p  | 630                                     |         |
| 4SNAREs, acceptor   | PC/PS (DO)               | Vam3p  | 910                                     | 1B      |
|                     |                          | Vti1p  | 710                                     |         |
|                     |                          | Vam7p  | 770                                     |         |
|                     |                          | Nyv1p  | 650                                     |         |
| R-SNARE, donor      | Vacuole (DO)             | Nyv1p  | 590                                     | 2A      |
| 3Q-SNAREs, acceptor | Vacuole (DO)             | Vam3p  | 800                                     | 2A      |
|                     |                          | Vti1p  | 690                                     |         |
|                     |                          | Vam7p  | 1800                                    |         |
| 4SNAREs, donor      | Vacuole (DO)             | Vam3p  | 1100                                    | 2B      |
|                     |                          | Vti1p  | 740                                     |         |
|                     |                          | Vam7p  | 740                                     |         |
|                     |                          | Nyv1p  | 710                                     |         |
| 4SNAREs, acceptor   | Vacuole (DO)             | Vam3p  | 1200                                    | 2B      |
|                     |                          | Vti1p  | 830                                     |         |
|                     |                          | Vam7p  | 830                                     |         |
|                     |                          | Nyv1p  | 710                                     |         |
| 4SNAREs, donor      | Vacuole/DAG/PIPs<br>(DO) | Vam3p  | 1100                                    | 2C      |
|                     |                          | Vti1p  | 830                                     |         |
|                     |                          | Vam7p  | 690                                     |         |
|                     |                          | Nyv1p  | 910                                     |         |
| 4SNAREs, acceptor   | Vacuole/DAG/PIPs<br>(DO) | Vam3p  | 1000                                    | 2C      |
|                     |                          | Vti1p  | 950                                     |         |
|                     |                          | Vam7p  | 830                                     |         |
|                     |                          | Nyv1p  | 1100                                    |         |
| 4SNAREs, donor      | Vacuole/DAG/PIPs<br>(PO) | Vam3p  | 2400                                    | 2D, 3   |
|                     |                          | Vti1p  | 1100                                    |         |
|                     |                          | Vam7p  | 1300                                    |         |
|                     |                          | Nyv1p  | 1400                                    |         |
| 4SNAREs, acceptor   | Vacuole/DAG/PIPs<br>(PO) | Vam3p  | 1400                                    | 2D, 3   |
|                     |                          | Vti1p  | 1000                                    |         |
|                     |                          | Vam7p  | 1100                                    |         |
|                     |                          | Nyv1p  | 1100                                    |         |

|                          |                                                   |       |      |       |
|--------------------------|---------------------------------------------------|-------|------|-------|
| 4SNAREs, donor           | Vacuole/DAG/PIPs<br>(PO)<br>NBD-PS<br>diI(5)C18ds | Vam3p | 1300 | 3E    |
|                          |                                                   | Vti1p | 770  |       |
|                          |                                                   | Vam7p | 670  |       |
|                          |                                                   | Nyv1p | 870  |       |
| QabR-SNAREs, donor       | Vacuole/DAG/PIPs<br>(PO)                          | Vam3p | 1500 | 5A    |
|                          |                                                   | Vti1p | 1100 |       |
|                          |                                                   | Nyv1p | 1100 |       |
| QabR-SNAREs,<br>acceptor | Vacuole/DAG/PIPs<br>(PO)                          | Vam3p | 450  | 5A    |
|                          |                                                   | Vti1p | 480  |       |
|                          |                                                   | Nyv1p | 500  |       |
| R-SNARE, donor           | Vacuole/DAG/PIPs<br>(PO)                          | Nyv1p | 710  | 5B, E |
| Qab-SNAREs, acceptor     | Vacuole/DAG/PIPs<br>(PO)                          | Vam3p | 690  | 5B, E |
|                          |                                                   | Vti1p | 500  |       |
| QaR-SNAREs, donor        | Vacuole/DAG/PIPs<br>(PO)                          | Vam3p | 2000 | 5C    |
|                          |                                                   | Nyv1p | 490  |       |
| Qb-SNAREs, acceptor      | Vacuole/DAG/PIPs<br>(PO)                          | Vti1p | 490  | 5C    |
| QbR-SNAREs, donor        | Vacuole/DAG/PIPs<br>(PO)                          | Vtip  | 480  | 5D    |
|                          |                                                   | Nyv1p | 420  |       |
| Qa-SNAREs, acceptor      | Vacuole/DAG/PIPs<br>(PO)                          | Vam3p | 570  | 5D    |
| 4SNAREs, donor           | Complete<br>(Vacuole/DAG/PIPs)<br>(PO)            | Vam3p | 1500 | 6     |
|                          |                                                   | Vti1p | 740  |       |
|                          |                                                   | Vam7p | 1100 |       |
|                          |                                                   | Nyv1p | 830  |       |
| 4SNAREs, acceptor        | Complete (PO)                                     | Vam3p | 1400 | 6     |
|                          |                                                   | Vti1p | 770  |       |
|                          |                                                   | Vam7p | 1200 |       |
|                          |                                                   | Nyv1p | 910  |       |
| 4SNAREs, donor           | - DAG (PO)                                        | Vam3p | 1400 | 6     |
|                          |                                                   | Vti1p | 710  |       |
|                          |                                                   | Vam7p | 1100 |       |
|                          |                                                   | Nyv1p | 910  |       |
| 4SNAREs, acceptor        | - DAG (PO)                                        | Vam3p | 1200 | 6     |
|                          |                                                   | Vti1p | 650  |       |
|                          |                                                   | Vam7p | 1100 |       |
|                          |                                                   | Nyv1p | 830  |       |
| 4SNAREs, donor           | - ERG (PO)                                        | Vam3p | 2300 | 6     |
|                          |                                                   | Vti1p | 800  |       |
|                          |                                                   | Vam7p | 1200 |       |
|                          |                                                   | Nyv1p | 830  |       |

|                   |                              |       |      |   |
|-------------------|------------------------------|-------|------|---|
| 4SNAREs, acceptor | - ERG (PO)                   | Vam3p | 710  | 6 |
|                   |                              | Vti1p | 490  |   |
|                   |                              | Vam7p | 610  |   |
|                   |                              | Nyv1p | 470  |   |
| 4SNAREs, donor    | - PI(3)P (PO)                | Vam3p | 1700 | 6 |
|                   |                              | Vti1p | 690  |   |
|                   |                              | Vam7p | 1000 |   |
|                   |                              | Nyv1p | 910  |   |
| 4SNAREs, acceptor | - PI(3)P (PO)                | Vam3p | 1300 | 6 |
|                   |                              | Vti1p | 740  |   |
|                   |                              | Vam7p | 1100 |   |
|                   |                              | Nyv1p | 910  |   |
| 4SNAREs, donor    | - PI(4,5)P <sub>2</sub> (PO) | Vam3p | 1500 | 6 |
|                   |                              | Vti1p | 710  |   |
|                   |                              | Vam7p | 950  |   |
|                   |                              | Nyv1p | 770  |   |
| 4SNAREs, acceptor | - PI(4,5)P <sub>2</sub> (PO) | Vam3p | 1300 | 6 |
|                   |                              | Vti1p | 650  |   |
|                   |                              | Vam7p | 950  |   |
|                   |                              | Nyv1p | 870  |   |

<sup>1</sup>See Materials and methods for the details of the lipid compositions.

<sup>2</sup>See Materials and methods for determination of lipid and SNARE concentrations of the proteoliposomes.
